## 23 **Abstract**

24 The use of tracking devices for collecting animal movement data has become widespread in recent  
25 decades. In parallel, this has sparked a proliferation of methods to infer individual behavior from  
26 tracking data. Being able to learn more than only the movement trajectories of animals from telemetry  
27 data is one of the major forces pushing the field of movement ecology forward. One application that  
28 has been poorly explored is the use of movement data to estimate reproductive success. We pioneered  
29 this application in birds by introducing a method to locate nesting attempts and estimate their outcome  
30 from tracking data. We implemented our method in the R package nestR and illustrate its application to  
31 three bird species: the wood stork (*Mycteria americana*), the lesser kestrel (*Falco naumanni*), and the  
32 Mediterranean gull (*Ichthyaetus melanocephalus*). We identified nest site locations based on the  
33 analysis of recursive movement patterns of breeding individuals acting as central place foragers. Using  
34 trajectories with known breeding attempts, we estimated a set of species-specific criteria for the  
35 identification of nest sites, using non-reproductive individuals as controls. We estimated nest survival  
36 as a measure of reproductive outcome from nest site re-visitation histories, using a Bayesian  
37 hierarchical modeling approach that accounted for temporally variable re-visitation patterns,  
38 probability of visit detection, and missing data. Provided the availability of adequate tracking data, our  
39 method can be broadly applied to estimate reproductive outcome in a variety of central place forager  
40 species. Inferring reproductive outcome from tracking data will allow ecologists to bridge the gap  
41 between movement and space use behavior, environmental factors, and their fitness consequences.

42

## 43 **Key-words**

44 movement ecology – GPS-tracking – fitness – Bayesian hierarchical models – R package nestR – wood  
45 stork – lesser kestrel – Mediterranean gull – nest survival – birds

46

## 47 **Introduction**

48 Technological advancements have resulted in an exponential increase in available animal tracking data  
49 in recent decades (Urbano et al., 2010; Kays, Crofoot, Jetz, & Wikelski, 2015; Wilmers et al., 2015).

50 The ability to obtain movement data at very fine resolutions brings us closer to understanding the  
51 behaviors underlying movement (Cagnacci, Boitani, Powell, & Boyce, 2010; Tomkiewicz, Fuller, Kie,  
52 & Bates, 2010). Inferring more than just the movement trajectories of animals from telemetry data is  
53 one of the major forces pushing the field of movement ecology forward (Nathan et al., 2008; Schick et  
54 al., 2008; Wilmers et al., 2015).

55 Knowing what an animal is doing when it is moving a certain way can improve our understanding of  
56 the links between movement and resource dynamics, species interactions, distribution, and individual  
57 fitness, which is a fundamental driver of population dynamics and evolutionary processes (Mueller &  
58 Fagan, 2008; Schick et al., 2008; Morales et al., 2010). The importance of this pursuit justifies the  
59 recent and ongoing proliferation of analytical techniques to infer behavior from movement (Gurarie et  
60 al., 2016; Thiebault, Dubroca, Mullers, Tremblay, & Pistorius, 2018). Many of these approaches seek to  
61 identify behavioral modes by splitting movement trajectories into behaviorally homogeneous bouts  
62 based on quantitative properties of the track (Edelhoff, Signer, & Balkenhol, 2016). For instance,  
63 topology-based segmentation techniques classify locations along a track into distinct groups based on  
64 the distribution of path metrics, such as turning angles and step length (Van Moorter, Visscher, Jerde,  
65 Frair, & Merrill, 2010) or speed (Garriga, Palmer, Oltra, & Bartumeus, 2016). Time-series analyses,  
66 such as behavioral change-point analysis (Gurarie, Andrews, & Laidre, 2009) or wavelet analysis  
67 (Soleymani, Pennekamp, Dodge, & Weibel, 2017) decompose trajectories by detecting significant  
68 changes of a path-signal in time. State-space models use a mechanistic approach to identify latent states  
69 in the data corresponding to different behavioral modes (Beyer, Morales, Murray, & Fortin, 2013).

70 These analytical tools differ from one another in their functioning, but all of them provide ways to  
71 relate movement patterns to the underlying behavioral processes (Edelhoff et al., 2016; Gurarie et al.,  
72 2016). For example, Polansky et al. (2015) used behavioral change point analysis to split African  
73 elephant (*Loxodonta africana*) trajectories into phases of goal-oriented, directed movement in the  
74 proximity of waterholes and phases of slower, more tortuous movement when resting or foraging.  
75 Similarly, Austin et al. (2019) identified three different behavioral modes, corresponding to foraging,

76 directed flight, and resting/searching, in magnificent frigatebird (*Fregata magnificens*) movement  
77 tracks using hidden Markov models.

78 Specific movement patterns can also diagnose events of interest: for example, Webb et al. (2008) used  
79 spatio-temporal clustering of wolf (*Canis lupus*) GPS-tracking data to identify kill sites. Other studies  
80 used changes in movement patterns to detect parturition events along ungulate GPS tracks, particularly  
81 moose (*Alces alces*; Severud et al., 2015; Nicholson et al., 2019) and caribou (*Rangifer tarandus*;  
82 DeMars, Auger Méthé, Schlägel, & Boutin, 2013; Bonar, Ellington, Lewis, & Vander Wal, 2018).  
83 These event-oriented applications aim to isolate focal episodes along a movement track, rather than  
84 dividing the entire trajectory into behavioral phases. Whether the objective is segmentation or the  
85 detection of events of interest, the signal used depends on what type of behavioral processes are being  
86 targeted (Nams, 2014). For wolf kill sites, the signal of interest would be a phase of restricted  
87 movement around a carcass (Webb et al., 2008). For calving moose and caribou, it would be a slow-  
88 down in movements due to the reduced mobility of newborns (DeMars et al., 2013; Nicholson et al.,  
89 2019).

90 In some contexts, recursive movement patterns can be an indicative signal of underlying processes  
91 (Berger-Tal & Bar-David, 2015; Bracis, Bildstein, & Mueller, 2018). Many animals keep returning to  
92 places of ecological significance, such as dens, nests, and foraging patches (Bracis et al., 2018). The  
93 periodicity of such recursive movements can provide insight into ecological processes (Riotte-Lambert,  
94 Benhamou, & Chamailé-Jammes, 2013). For example, recursive movement patterns have been studied  
95 in herbivores with the objective of understanding movement responses to spatio-temporal variability of  
96 resources, such as cycles of forage depletion and greening (Bar-David et al., 2009). Bracis et al. (2018)  
97 analyzed recursive movement patterns of a turkey vulture (*Cathartes aura*) to identify roost sites.  
98 Recursive movement patterns can provide insight into behavior and life-history as well (Bracis et al.,  
99 2018). Some animals are tied to specific locations in specific phases of their life cycle and exhibit  
100 recursive movements to and from those locations (Bracis et al., 2018). These include altricial breeding  
101 bird species. While breeding, altricial bird species act as central place foragers (*sensu* Orians &  
102 Pearson, 1979), recursively departing from their nest site to embark on foraging trips and returning to

103 incubate their eggs or provide food for their nestlings (Andersson, 1981; Alonso, Carrascal, Muñoz-  
104 Pulido, & Alonso, 1994; Burke & Montevecchi, 2009). Back-and-forth trips can therefore be observed  
105 in movement data and used to identify when and where a bird is nesting. Once the location of a nest has  
106 been identified, patterns of nest site re-visitation may reveal information about the fate of a breeding  
107 attempt and may be used to infer reproductive outcome. Being able to estimate reproductive outcome  
108 from tracking data connects movement to reproduction, an important component of individual fitness  
109 (Morales et al., 2010; Singh & Ericsson, 2014). This could be especially valuable whenever gathering  
110 data on reproductive outcome through direct observation is logistically difficult or impractical (Etterson  
111 et al., 2011; Wilmers et al., 2015; Nicholson et al., 2019). Moreover, inferring reproductive outcome  
112 from movement establishes a direct link between environmental dynamics and components of  
113 individual fitness if tracking data is coupled with remote sensing data (Cagnacci et al., 2010; Pettorelli  
114 et al., 2014). While tools to infer behavioral structure along animal trajectories have been extensively  
115 used to evaluate responses to environmental factors or internal state, few studies so far have attempted  
116 the use of movement data to assess reproductive success (DeMars et al., 2013). The applications of path  
117 segmentation to detect ungulate parturition have been the first attempts at the task (DeMars et al.,  
118 2013). Besides these examples, efforts to apply movement pattern detection to the estimation of  
119 reproductive metrics have been limited. To our knowledge, no study has attempted to infer avian  
120 reproductive fitness from movement data.

121 Here, we introduce a data-driven method to locate breeding attempts along movement trajectories of  
122 altricial bird species and estimate their outcome based on patterns of nest re-visitation. Our approach  
123 combines event-oriented pattern detection with the analysis of recursive movement patterns. Our  
124 workflow is implemented in the R package nestR (<https://github.com/picardis/nestR>). We demonstrate  
125 the broad applicability of our approach by illustrating its use on GPS-tracking data for three altricial  
126 species that broadly differ in their breeding habitat and ecology: the wood stork (*Mycteria americana*),  
127 the lesser kestrel (*Falco naumanni*), and the Mediterranean gull (*Ichthyaetus melanocephalus*).

128 Example datasets for all three species are available in nestR.

129

## 130 **Materials and Methods**

### 131 Method description

132 *Nest site detection* – Figure 1 provides a roadmap of our workflow. Nest sites are identified as  
133 repeatedly visited locations along individual trajectories (Figure 1). Returns to a location are defined as  
134 returns to a circular area of a user-defined radius, obtained by placing a buffer around each point of the  
135 trajectory. Due to both behavior and GPS error, GPS points at a revisited location may be spatially  
136 scattered around the true center (Frair et al., 2010). Defining locations as buffers around points helps  
137 account for this scattering. The size of the buffer sets the spatial scale at which re-visitation patterns  
138 will be calculated. Re-visitation patterns are described by the following set of parameters: the  
139 maximum number of consecutive days a location is visited; the percentage of days visited between the  
140 first and last visit; and the percent fixes at the nest on the day with maximum attendance. Parameter  
141 values are then used as diagnostic features to filter nest sites among re-visited locations, based on the  
142 rationale that re-visitation patterns of nest sites differ from those of non-nest sites. Nest sites are often  
143 visited for longer stretches of consecutive days, on more days, and more frequently or for longer within  
144 a day than other types of re-visited locations. Especially during incubation, many bird species attend  
145 their nests intensively (e.g., Norton, 1972; van Vesseem & Draulans, 1986; Ojowski, Eidtmann, Furness,  
146 & Garthe, 2001). The parameters we use to describe re-visitation patterns are meant to capture these  
147 diagnostic behaviors and are used to identify nest sites among re-visited locations. In nestR, the  
148 identification of nests is implemented in the function `find_nests()`. Besides the tracking data and the set  
149 of filtering parameters, this function also takes as input a series of species- and data-specific parameters  
150 used to tailor the algorithm to different case studies. These include arguments that restrict the analysis  
151 within the breeding season for a given species, and arguments that help account for data sampling rate  
152 and fix failure rate. For a more thorough discussion of function arguments, we direct the reader to the  
153 nestR package vignette.

154 Unless prior knowledge is available about re-visitation patterns to nest sites, researchers will need ways  
155 to inform their choice of parameter values used for filtering nest sites among re-visited locations  
156 (Figure 1). If the true location of a nest is known for a subset of the data, researchers can compare re-

157 visitation patterns at known nest sites to those of non-nest sites and find one or more sets of parameter  
158 values to discriminate between them. If no on-ground data is directly available, researchers can visually  
159 explore the data and identify trusted nest sites, where possible. For example, likely nest sites can be  
160 recognized based on habitat features or proximity to known breeding colonies. An interactive  
161 visualization tool is available in nestR in the form of a Shiny (<https://shiny.rstudio.com>) app that lets  
162 users dynamically explore re-visited locations on satellite imagery while manipulating parameters in  
163 real time. Once known or trusted nest sites are identified, non-nest sites can be selected based on a  
164 criterion of temporal overlap; revisited locations that were visited simultaneously with the breeding  
165 attempt can be assumed to not be nest sites, assuming birds cannot breed in two places at the same  
166 time. Running the function `find_nests()` with non-constraining values for the filtering parameters will  
167 return any re-visited locations, among which the user can pick known nest and non-nest sites to  
168 compare (Figure 1).

169 Several approaches are possible to identify sets of parameter values to distinguish nest from non-nest  
170 sites. In nestR, we implemented one possible approach based on classification and regression trees  
171 (CART; De'ath & Fabricius, 2000). The function `discriminate_nests()` applies a CART algorithm to a  
172 dataset of known nest and non-nest sites given as input. The tree gets pruned to the optimal number of  
173 nodes based on a minimum relative error criterion (De'ath & Fabricius, 2000). If input data is split into  
174 training and testing fractions, the CART also provides estimates of classification error rates through  
175 cross-validation.

176 The CART identifies one or more sets of parameter values that best discriminate between nest and non-  
177 nest sites (Figure 1). Researchers can then plug these parameter values into the filtering arguments of  
178 `find_nests()` to identify nest sites only among re-visited locations (Figure 1). Researchers can decide  
179 how to deal with candidate breeding attempts that temporally overlap with each other. Assuming birds  
180 cannot breed in two places at the same time, the recommended option is to pick the top candidate  
181 among any set of temporally overlapping ones and discard the rest. For each nest site, `find_nests()`  
182 outputs a summary of re-visitation patterns and a history of nest re-visitation (in the form of a presence/  
183 absence time series, with GPS fixes within the nest buffer assigned to the status "present" and GPS

184 fixes outside of the nest buffer to “absent”). This time series is then used to estimate the outcome of  
185 breeding attempts.

186 *Reproductive outcome estimation* – The outcome of each identified breeding attempt is estimated using  
187 a Bayesian hierarchical modeling approach (Figure 1). A breeding attempt is considered successful if  
188 the nest site was visited until the end of a complete breeding cycle for the focal species. The model  
189 estimates nest survival based on patterns of nest site re-visitation, taking into account imperfect  
190 detection of nest visits and missing fixes. The MCMC algorithm is implemented in JAGS (Plummer,  
191 2003) via the R package rjags.

192 The model specification includes two processes: the survival process, which is not directly observable,  
193 and the observation process, which is the signal observed in the re-visitation histories. Much like a  
194 Bayesian implementation of a Cormack-Jolly-Seber capture-mark-recapture model (Lebreton,  
195 Burnham, Clobert, & Anderson, 1992), the latent nest survival variable is modeled at the daily scale as  
196 a function of survival status at the previous time-step and daily survival probability:

$$197 \quad z_t \sim \text{Bern}(z_{t-1} \times \phi_{t-1})$$

198 Observed visits on a given day are modeled as a function of current nest survival status, probability of  
199 visit detection on that day, and number of GPS fixes available on that day:

$$200 \quad Y_t \sim \text{Bin}(z_t \times p_t, N_t)$$

201 Where the probability of detection is:

$$202 \quad p_t = \text{Pr}(\text{visit detected} | z_t = 1, N_t)$$

203 Reproductive outcome is defined as the probability that the nest was still surviving on the last day of  
204 the theoretical duration of a complete breeding attempt:

$$205 \quad \text{Pr}(z_T = 1)$$

206 Where  $T$  is the duration of a complete breeding attempt. Both survival and detection probability are  
207 modeled using a binomial Generalized Linear Model as a function of the day of the attempt:

$$208 \quad \text{logit}(\phi_t) = \beta_{\phi_0} + \beta_{\phi_1} \times t$$

$$209 \quad \text{logit}(p_t) = \beta_{p_0} + \beta_{p_1} \times t$$



210 The model is fully specified by using uninformative priors on the Beta parameters, in this case a normal  
211 distribution with a mean of 0 and precision of  $1e^{-5}$ . In the current implementation, daily survival and  
212 detection are assumed to be the same for all nests in the population. The model outputs daily estimates  
213 of survival and detection probability at the population level, as well as daily survival estimates for each  
214 breeding attempt along with credible intervals.

### 215 Applications to data

216 We applied our workflow to GPS-tracking data for 148 individual-years for wood storks (henceforth  
217 storks), 53 for lesser kestrels (henceforth kestrels) and 29 for Mediterranean gulls (henceforth gulls).  
218 All tags were solar-powered and recorded fixes primarily during daytime. Details about devices,  
219 settings, harnesses and study areas regarding storks and kestrels can be found in Borkhataria et al.  
220 (2008) and Cecere et al. (2018), respectively. We split data into individual-years such that breeding  
221 activities were contained within them. To find nest sites, we restricted the analysis to data within the  
222 breeding season for each species (Table 1). While both kestrels and gulls have a well-defined breeding  
223 season between April and August in our study areas (Snow, Perrins, Hillcoat, Gillmor, & Roselaar,  
224 1997), storks in the southeastern U.S. can breed at slightly different times of the year depending on  
225 latitude (Coulter, Rodgers, Ogden, & Depkin, 1999; Table 1). In this case, we only excluded the  
226 window of time where no breeding activities were expected to occur anywhere in the range from the  
227 analysis.

228 Given the spatial resolution of the GPS data (Table 1) and the expected scale of movements around the  
229 nest site for all three species, we used a buffer of 40 m around each GPS position. We initially screened  
230 trajectories for any re-visited locations using non-constraining values in filtering parameters (which is  
231 equivalent to not applying any filtering). We then used on-ground data on known nest locations to  
232 select true nests and non-nest sites among re-visited locations. Kestrels and gulls were captured at the  
233 nest site (Table 1), so the location of the nest was known. For storks, on-ground data on nest locations  
234 was available for 10 individual-years (Bear D., unpublished data). We explored the remaining stork  
235 trajectories and identified those for which the top visited location was at a known breeding colony (data

236 from USFWS 2018). We identified 97 of these, marked them as trusted and treated them as known nest  
237 sites for the rest of the analysis.

238 We used CART to compare re-visitation patterns between nest and non-nest sites. We split each of the  
239 three datasets in two parts for training and testing (3:2 ratio). We used the resulting sets of parameter  
240 values to filter nest sites among re-visited locations in the trajectories of breeding individuals (Table 2).  
241 Even when the CART did not suggest that the number of consecutive days visited was an important  
242 predictor of true nest sites, we chose a reasonable value to use as a threshold for this parameter (Table  
243 2). We did not expect to have enough power to discern nest from non-nest sites for attempts that failed  
244 in the first handful of days. We only retained a top candidate among any sets of breeding attempts that  
245 were temporally overlapping. We used non-breeder trajectories (subadults in the case of storks, non-  
246 breeding season data in the case of kestrels and gulls) to validate our results against false positives. We  
247 calculated the positive predictive value of our algorithm as the percentage of known nest sites among  
248 the total number of nest sites we found for each species. We calculated the sensitivity of our algorithm  
249 as the percentage of the known nest sites that were identified. We calculated the false negative rate as  
250 the percentage of known nest sites that we failed to identify. Finally, we calculated the false positive  
251 rate as the percentage of non-breeding individual-years for which we erroneously identified a nest site.  
252 We fit the nest survival model described above to estimate the outcome of the identified breeding  
253 attempts. Since kestrels and gulls were captured after they had already started breeding, the initial part  
254 of every breeding attempt was missing from the data. To account for this, we subtracted the average  
255 number of days from start to hatching (for kestrels) and to late incubation (for gulls) from the full  
256 breeding cycle when specifying the expected duration of a complete attempt (Table 1).

257

## 258 **Results**

259 The initial screening with no filtering identified 9954 re-visited locations (i.e., potential nest sites) for  
260 storks, 1285 for kestrels, and 1342 for gulls. Results from the CART showed that the optimal set of  
261 parameter values to discriminate nest from non-nest sites was 18 minimum consecutive days visited  
262 and 90% minimum nest attendance on the top day for storks, and 52% and 45% minimum attendance

263 on the top day for kestrels and gulls, respectively (Figure 2). In addition to the parameters suggested by  
264 the CART, we used a minimum of 4 and 8 consecutive days visited for kestrels and gulls, respectively  
265 (Table 2). By filtering re-visited locations using the parameters listed in Table 2, we identified 106 nest  
266 sites for storks, 49 for kestrels, and 28 for gulls, which closely matches the number of nest sites we  
267 were expecting to find (Table 1). As a consequence, the positive predictive value of the algorithm  
268 ranged between 78-94%, the sensitivity between 75-86%, and the false negative rate between 14-25%  
269 (Table 3). The false positive rate was below 7% for storks and gulls but reached 68% for kestrels (Table  
270 3). The probability of detecting nest visits decreased throughout the breeding attempt for all three  
271 species (Figure 3). The distribution of survival estimates at the individual level differed between known  
272 failed and successful attempts, although with some degree of overlap, especially for kestrels (Figure 4).  
273 No data on true outcomes were available for storks, therefore we were unable to verify survival  
274 estimates for this species.

275

## 276 **Discussion**

277 We present an original, data-driven method to identify nest site locations of altricial avian species and  
278 estimate the outcome of breeding attempts based on GPS-tracking data. This is among the first attempts  
279 to use telemetry data to infer a major component of fitness (DeMars et al., 2013), and the first applied  
280 to birds. We demonstrated the broad applicability of our method by illustrating its use on GPS-tracking  
281 data from three species representative of different ecosystems, including a subtropical wading bird, a  
282 small steppe raptor, and a seabird. The implementation of our workflow in the R package nestR is  
283 straightforward and requires the use of intuitive, biologically interpretable parameters.

284 *Nest site detection* – Our nest site detection method performed well on all three species, allowing us to  
285 correctly identify most of the known nest sites from movement trajectories of breeding individuals. We  
286 achieved high positive predictive value and sensitivity. Moreover, we may have underestimated the  
287 positive predictive value by not being able to confirm possible second attempts following early failures.  
288 All the species we tested our method on may attempt to breed a second time if their first clutch fails

289 early on, and it is possible that the nest sites we were unable to confirm included second attempts in  
290 addition to non-nests.

291 Differences between our case-study datasets both in terms of species ecology and data characteristics  
292 also presented us with different challenges. The main problem we had to deal with when applying our  
293 method to storks was not having much on-ground data. Most of the nest locations we treated as known  
294 were trusted nest sites for which we did not have on-ground confirmation (97 out of 107). Moreover,  
295 we had no information regarding the outcome of the breeding attempts, and therefore we were not able  
296 to validate results of the outcome estimation for this species. The strengths of this dataset were, first,  
297 the large sample size; and second, the fact that birds were tagged at fledging or while non-breeding and  
298 were tracked for several years, so we had data for the entire breeding cycle for all the attempts. For  
299 kestrels and gulls, this was not the case. Both kestrels and gulls were tagged after the breeding attempt  
300 had already started, so the incubation phase was partly (for gulls) or entirely (for kestrels) missing from  
301 the data. Missing the first part of breeding attempts affected our ability to identify nest sites. Nest  
302 attendance is high during incubation in many altricial bird species whose nestlings are not able to  
303 thermoregulate autonomously (DuRant, Hopkins, Hepp, & Walters, 2013; see Clark, 1980 for an  
304 example on storks). Not having tracking data for kestrels and gulls for the phase where re-visitation  
305 patterns most obviously diagnose nesting behavior hampered our ability to identify nest sites. For  
306 storks the lower false negative rate might have resulted from the relatively strict constraint we enforced  
307 for the minimum number of consecutive days; it is possible that some of the stork breeding attempts we  
308 missed failed before reaching the 18-day mark. Not identifying breeding attempts whose duration does  
309 not exceed the minimum constraint applied is a logical implication rather than a failure. In 3 cases out  
310 of 7, early failed attempts (within the 2 days following tagging) also explain missed detection of gull  
311 nest sites. For kestrels, the behavior of males might also have played a role in hampering nest site  
312 detection: 3 of the 10 nest sites that we failed to identify appear to be possible roosting sites used by  
313 males at night in the proximity of the nesting colony. Because the use of the roosting sites is temporally  
314 overlapping with the breeding attempt, roosting sites were likely to be selected for males instead of nest  
315 sites whenever attendance was higher at the roost compared to the nest. When considered in the light of

316 these unavoidable data limitations and behavioral constraints, the performance of our nest site detection  
317 method is well above satisfactory.

318 Another drawback of the kestrel and gull datasets, especially gulls, is that sample size was small. Small  
319 sample size might have played a role in determining the high error rates we obtained as estimates from  
320 the CART and from our post-hoc assessment. Increasing the proportion of data used for training the  
321 CART should lead to more discerning power and more accurate results, likely at the cost of an accurate  
322 estimation of cross-validation error rates. When constrained by small sample sizes, the choice of  
323 whether to prioritize more accuracy in parameter selection or cross-validation is a judgement call that  
324 depends on the study objectives and circumstances. If a post-hoc evaluation of classification  
325 performance is deemed sufficient, researchers may choose to use the entire subset of data for which  
326 nest locations are known to train the CART and skip the cross-validation.

327 Several factors may contribute to explain the discrepancies (both positive and negative) we observed  
328 between the error rates we expected based on the CART output and the realized error rates. The error  
329 rates estimated by the CART do not take into account an additional layer of skimming that is  
330 introduced later in the analysis when competing attempts that temporally overlap to a top candidate are  
331 discarded. This should reduce the realized false positive rate compared to what is expected based on  
332 cross-validation alone. In our case, this was verified for both storks and gulls. However, spurious nest  
333 sites were identified in some of the non-breeding kestrel tracks. This is likely explained by species-  
334 specific behavior: non-breeding kestrels spend long stretches of time and consecutive days on a perch  
335 while scanning for prey or resting. Distinguishing these patterns of attendance and re-visitation from  
336 those of a nest might be challenging without applying restrictions based on seasonality and  
337 geographical area. The underestimation of false negative rates based on the CART cross-validation  
338 compared to our post-hoc assessment is in part due to the constraints we added in terms of minimum  
339 consecutive days for kestrels and gulls. While decreasing our power to detect some early failed  
340 breeding attempts, applying these additional constraints increased the positive predictive value in both  
341 cases. Discrepancies between the expected and realized error rates also result, in part, from the  
342 randomization selection of the sample used to train the CART.

343 Error rates for nest site identification vary in importance depending on the study objectives. If the  
344 objective is to estimate reproductive outcome, ensuring that attempts are not missed should receive  
345 priority over avoiding the selection of non-nest sites. Any re-visited location that gets erroneously  
346 identified as a nest site would likely be classified as a failed attempt eventually anyway, and would not  
347 affect estimates of the absolute number of successful attempts at the population level. In this case, we  
348 suggest that researchers may want to focus on minimizing false negatives. Conversely, if the objective  
349 of a study is, for instance, to analyze factors associated with nest site selection, minimizing false  
350 positives should be the priority.

351 In an ideal situation, researchers would have access to high (or high-enough-) resolution data for the  
352 focal species, with abundant on-ground data about nest locations and outcome to train the algorithm of  
353 choice, estimate error rates, and validate results. Once this is done, data characteristics being equal, the  
354 parameters found to identify nest sites can be applied to new individuals of the same species for which  
355 on-ground information is not available. If CART is the tool of choice to inform the choice of parameter  
356 values, we underline that classification thresholds in output should be used with caution, and  
357 considered more as range indications than as clear-cut rules. We also recommend that parameter values  
358 suggested by the outcome of the CART should be critically evaluated for their biological significance  
359 before use, and that adjustments should be made as needed based on knowledge of the species biology.  
360 Future efforts to improve our method for the identification of nest locations will include incorporating  
361 uncertainty in our estimates of nest sites, allowing us to interpret classification results in a probabilistic  
362 framework.

363 *Reproductive outcome estimation* – We obtained a satisfactory degree of separation in the estimated  
364 probabilities of survival between failed and successful attempts in both gulls and kestrels, with the  
365 estimates generally reflecting the true outcome of breeding attempts. However, having incomplete data  
366 for each breeding attempt for kestrels and gulls affected the accuracy of our outcome estimation.  
367 Missing the initial part of the attempts required adjustments of the parameter used to define the  
368 duration of a breeding cycle in the nest survival models, which inevitably came with some assumptions  
369 and generalizations. Namely, we assumed that the number of days that were missing from the data was

370 the same for all individuals within each species. If inaccurate, this assumption can result in wrong  
371 estimation of reproductive outcome. Assuming too short a duration of the missing initial phase can lead  
372 to underestimating reproductive outcome, by predicting true successes as failures, while assuming too  
373 long a duration can result in the opposite error, leading to the prediction of true failures as successes.  
374 Given the asynchrony of tagging dates and actual start dates of each breeding attempt, subtracting the  
375 same number of days from the breeding cycle for all individuals likely led to temporal mismatches. If  
376 the association between wrong estimation and true outcome is random, estimation errors should not  
377 affect population-level inference on the proportion of successful breeding events. In the absence of the  
378 data limitations we discussed, the performance of our method would likely improve compared to the  
379 results we presented.

380 An advantage of the kestrel and gull datasets, unlike the stork dataset, was the high temporal resolution.  
381 Lower sampling rates more likely result in lower detectability of nest visits, especially in some phases  
382 of the breeding attempt. For example, storks greatly reduce the frequency of their nest visits in the late  
383 nestling-rearing phase, making the detection of nest visits drop in the final part of breeding attempts  
384 with data at a 1-hour resolution. Detecting nest visits is critical for the estimation of reproductive  
385 outcome. Therefore, the higher the temporal resolution of the GPS data, the more reliable the estimates  
386 of reproductive outcome will be. Detectability of nest visits depends on the interaction of both species  
387 behavior and data resolution, as the probability of detecting a visit results from the combination of the  
388 actual frequency and duration of visits and the sampling rate. Therefore, there is no absolute rule-of-  
389 thumb as to what constitutes an adequate time resolution. Rather, sampling rate may be adjusted  
390 according to behavioral characteristic of each species when the study is designed.

391 The considerations we have made so far highlight how knowledge of the ecology of the focal species is  
392 necessary to successfully use the tools we presented in this paper. Researchers also need to be aware of  
393 data constraints and limitations. Overall, our application cases provide an illustration of how  
394 researchers can make the most of their imperfect data and still get useful, robust results while  
395 considering real-world shortcomings.

396 *Synthesis and significance* – The most important implication of our work is the ability to use telemetry  
397 data to obtain estimates of bird reproductive outcome. Reproductive outcome is an important  
398 component of fitness, and estimating it from tracking data will help bridge the long-sought connection  
399 between movement and space use and components of demography at the individual level (Nathan et al.,  
400 2008; Morales et al., 2010). Our method allows researchers to obtain critical information on  
401 reproductive outcome for birds that nest in remote or inaccessible locations where it is difficult or risky  
402 to collect on-ground data (Götmark, 1992; Mayer-Gross, Crick, & Greenwood, 1997; Etterson et al.,  
403 2011; Wilmers et al., 2015). Getting information on reproductive outcome from tracking data also has  
404 the advantage of allowing ready combination with environmental conditions experienced by individual  
405 birds (Cagnacci et al., 2010; Pettorelli et al., 2014). This opens new, previously unattainable research  
406 avenues regarding links between components of individual fitness, movement strategies, and habitat.  
407 A limitation of our approach is that it does not provide estimation of reproductive success in terms of  
408 number of offspring, but only in terms of overall success or failure (where success corresponds to at  
409 least one nestling fledged and failure to none). However, estimating reproductive success at a finer  
410 level might be possible in species whose behavioral signature in terms of nest site re-visitation patterns  
411 differs depending on clutch size.

412 Besides estimating reproductive outcome, our method is useful as a tool to identify nest site locations.  
413 Identifying nest sites is valuable in and of itself: for example, it may allow researchers to find  
414 previously unknown nesting sites in species for which breeding locations are partly or entirely  
415 unknown. Overall, our method can appeal to researchers with different objectives. First, it may be  
416 useful to researchers that want to investigate reproductive outcome in relation to movement and  
417 environmental factors. Second, it may serve researchers that want to obtain data on reproductive  
418 outcome for species that are not easy to monitor on the ground. Third, it may be of use to researchers  
419 that want to identify the location of nest sites for analyses of breeding site fidelity, nest-site selection  
420 (Powell, Hodgman, Glanz, Osenton, & Fisher, 2010), or discovery of new breeding sites. Conservation  
421 and management applications may both benefit from the availability of the tools we presented. Our  
422 method can be applied both in situations of opportunistic use of historical tracking data or in cases



423 where the study is explicitly designed with these objectives in mind. Potentially, our framework can  
424 even be adjusted for the identification of types of re-visited locations other than nest sites and taxa  
425 other than birds.

426 Future research could focus on analyzing the temporal variation of the periodicity of nest visits  
427 throughout the attempt, and possibly use that to recognize specific phases within the attempt  
428 (incubation, early nestling-rearing, etc.). This would provide insight over the temporal component of  
429 nesting patterns, allowing researchers to pinpoint the occurrence of events such as egg-laying or  
430 hatching.

431

### 432 **Conclusions**

433 In the context of the ever-growing availability of telemetry data for more and smaller species and at  
434 higher spatio-temporal resolution, the potential of the application we presented is vast. Our method can  
435 be used to identify nest sites and estimate reproductive outcome of a broad variety of avian species.  
436 When looked at from multiple angles and in different ecological contexts, the relationship between  
437 movement and reproductive success can be investigated in a cohesive overarching framework at the  
438 interface of avian and movement ecology.

439

### 440 **Acknowledgments**

441 We thank J. Hightower and C. Poli for providing helpful comments on earlier versions of this  
442 manuscript. The wood stork tracking project was funded by the U. S. Fish and Wildlife Service, the  
443 Army Corps of Engineers, the National Park Service, the Environmental Protection Agency (STAR  
444 Fellowship to R.B.), the USDA National Institute of Food and Agriculture, and the Everglades  
445 Foundation (ForEverglades Scholarship to S.P.). The Mediterranean gull tracking project was funded  
446 by the Ministry for Environment, Land and Sea Protection of Italy and carried out with the support of  
447 Ente Parco Delta del Po Emilia-Romagna, Reparto Carabinieri per la Biodiversità di Punta Marina, R.  
448 Nardelli, A. Andreotti, G. Meneghini, F. Spina. Lesser kestrel tracking project activities were carried  
449 out within the framework of the LIFE+Natura project “Un falco per amico” (LIFE11/NAT/IT000068)

450 with the support of S. Podofillini, E. Fulco, P. Giglio, S. C. Pellegrino, M. Lorusso (Comune di  
451 Altamura), F. Parisi (Comune di Gravina in Puglia), and D. Ciamparella (project manager). Any use of  
452 trade, firm, or product names is for descriptive purposes only and does not imply endorsement by the  
453 U. S. Government.

454

#### 455 **Authors' Contributions**

456 S. Picardi conceived the idea. S. Picardi., B. J. S., and M. E. B. implemented the analyses. S. Picardi  
457 wrote the paper. M. B. and P. C. F. supervised research. J. G. C., D. R., L. S., S. Pirrello, and R. R. B.  
458 collected the data. All authors contributed to revisions.

459

#### 460 **References**

- Alonso, J. C., Carrascal, L. M., Muñoz-Pulido, R., & Alonso, J. A. (1994). Flock Size and Foraging  
Decisions in Central Place Foraging White Storks, *Ciconia Ciconia*. *Behaviour*, *129*(3–4), 279–  
292. doi:10.1163/156853994X00640
- Andersson, M. (1981). Central Place Foraging in the Whinchat, *Saxicola Rubetra*. *Ecology*, *62*(3), 538–  
544. doi:10.2307/1937718
- Austin, R., De Pascalis, F., Arnould, J., Haakonsson, J., Votier, S., Ebanks-Petrie, G., ... Green, J.  
(2019). A sex-influenced flexible foraging strategy in a tropical seabird, the magnificent  
frigatebird. *Marine Ecology Progress Series*, *611*, 203–214. doi:10.3354/meps12859
- Bar-David, S., Bar-David, I., Cross, P. C., Ryan, S. J., Knechtel, C. U., & Getz, W. M. (2009). Methods  
for assessing movement path recursion with application to African buffalo in South Africa.  
*Ecology*, *90*(9), 2467–2479. doi:10.1890/08-1532.1
- Berger-Tal, O., & Bar-David, S. (2015). Recursive movement patterns: review and synthesis across  
species. *Ecosphere*, *6*(9), 1–12. doi:10.1890/ES15-00106.1
- Beyer, H. L., Morales, J. M., Murray, D., & Fortin, M.-J. (2013). The effectiveness of Bayesian state-  
space models for estimating behavioural states from movement paths. *Methods in Ecology and  
Evolution*, *4*(5), 433–441. doi:10.1111/2041-210X.12026

- Bonar, M., Ellington, E. H., Lewis, K. P., & Vander Wal, E. (2018). Implementing a novel movement-based approach to inferring parturition and neonate caribou calf survival. *PLOS ONE*, *13*(2), e0192204. doi:10.1371/journal.pone.0192204
- Borkhataria, R. R., Frederick, P. C., Hylton, R., Bryan, A. L., & Rodgers, J. A. (2008). A Preliminary Model of Wood Stork Population Dynamics in the Southeastern United States. *Waterbirds*, *31*(sp1), 42–49. doi:10.1675/1524-4695(2008)31[42:APMOWS]2.0.CO;2
- Bracis, C., Bildstein, K. L., & Mueller, T. (2018). Revisitation analysis uncovers spatio-temporal patterns in animal movement data. *Ecography*, *41*(11), 1801–1811. doi:10.1111/ecog.03618
- Burke, C. M., & Montevecchi, W. A. (2009). The foraging decisions of a central place foraging seabird in response to fluctuations in local prey conditions. *Journal of Zoology*, *278*(4), 354–361. doi:10.1111/j.1469-7998.2009.00584.x
- Cagnacci, F., Boitani, L., Powell, R. A., & Boyce, M. S. (2010). Animal ecology meets GPS-based radiotelemetry: a perfect storm of opportunities and challenges. *Philosophical Transactions of the Royal Society B: Biological Sciences*, *365*(1550), 2157–2162. doi:10.1098/rstb.2010.0107
- Cecere, J. G., Bondì, S., Podofillini, S., Imperio, S., Griggio, M., Fulco, E., ... Rubolini, D. (2018). Spatial segregation of home ranges between neighbouring colonies in a diurnal raptor. *Scientific Reports*, *8*(1), 11762. doi:10.1038/s41598-018-29933-2
- Clark, E. S. (1980). The Attentiveness and Time Budget of a Pair of Nesting Wood Storks. *Proceedings of the Colonial Waterbird Group*, *3*, 204–215.
- Coulter, M. C., Rodgers, J. A., Ogden, J. C., & Depkin, F. C. (1999). Wood Stork (*Mycteria americana*). *The Birds of North America*, (409), 24.
- De'ath, G., & Fabricius, K. E. (2000). Classification and Regression Trees: A Powerful yet Simple Technique for Ecological Data Analysis. *Ecology*, *81*(11), 3178–3192. doi:10.1890/0012-9658(2000)081[3178:CARTAP]2.0.CO;2
- DeMars, C. A., Auger Méthé, M., Schlägel, U. E., & Boutin, S. (2013). Inferring parturition and neonate survival from movement patterns of female ungulates: a case study using woodland caribou. *Ecology and Evolution*, *3*(12), 4149–4160. doi:10.1002/ece3.785

- DuRant, S. E., Hopkins, W. A., Hepp, G. R., & Walters, J. R. (2013). Ecological, evolutionary, and conservation implications of incubation temperature-dependent phenotypes in birds. *Biological Reviews*, *88*(2), 499–509. doi:10.1111/brv.12015
- Edelhoff, H., Signer, J., & Balkenhol, N. (2016). Path segmentation for beginners: an overview of current methods for detecting changes in animal movement patterns. *Movement Ecology*, *4*, 21. doi:10.1186/s40462-016-0086-5
- Etterson, M. A., Ellis-Felege, S. N., Evers, D., Gauthier, G., Grzybowski, J. A., Mattsson, B. J., ... Potvien, A. (2011). Modeling fecundity in birds: Conceptual overview, current models, and considerations for future developments. *Ecological Modelling*, *222*(14), 2178–2190. doi:10.1016/j.ecolmodel.2010.10.013
- Frair Jacqueline L., Fieberg John, Hebblewhite Mark, Cagnacci Francesca, DeCesare Nicholas J., & Pedrotti Luca. (2010). Resolving issues of imprecise and habitat-biased locations in ecological analyses using GPS telemetry data. *Philosophical Transactions of the Royal Society B: Biological Sciences*, *365*(1550), 2187–2200. doi:10.1098/rstb.2010.0084
- Garriga, J., Palmer, J. R. B., Oltra, A., & Bartumeus, F. (2016). Expectation-Maximization Binary Clustering for Behavioural Annotation. *PLOS ONE*, *11*(3), e0151984. doi:10.1371/journal.pone.0151984
- Götmark, F. (1992). The Effects of Investigator Disturbance on Nesting Birds. In D. M. Power (Ed.), *Current Ornithology* (pp. 63–104). Boston, MA: Springer US. doi:10.1007/978-1-4757-9921-7\_3
- Gurarie, E., Andrews, R. D., & Laidre, K. L. (2009). A novel method for identifying behavioural changes in animal movement data. *Ecology Letters*, *12*(5), 395–408. doi:10.1111/j.1461-0248.2009.01293.x
- Gurarie, E., Bracis, C., Delgado, M., Meckley, T. D., Kojola, I., & Wagner, C. M. (2016). What is the animal doing? Tools for exploring behavioural structure in animal movements. *Journal of Animal Ecology*, *85*(1), 69–84. doi:10.1111/1365-2656.12379

- Kays, R., Crofoot, M. C., Jetz, W., & Wikelski, M. (2015). Terrestrial animal tracking as an eye on life and planet. *Science*, *348*(6240), aaa2478. doi:10.1126/science.aaa2478
- Lebreton, J.-D., Burnham, K. P., Clobert, J., & Anderson, D. R. (1992). Modeling Survival and Testing Biological Hypotheses Using Marked Animals: A Unified Approach with Case Studies. *Ecological Monographs*, *62*(1), 67–118. doi:10.2307/2937171
- Mayer-Gross, H., Crick, H. Q. P., & Greenwood, J. J. D. (1997). The effect of observers visiting the nests of passerines: an experimental study. *Bird Study*, *44*(1), 53–65. doi:10.1080/00063659709461038
- Morales Juan M., Moorcroft Paul R., Matthiopoulos Jason, Frair Jacqueline L., Kie John G., Powell Roger A., ... Haydon Daniel T. (2010). Building the bridge between animal movement and population dynamics. *Philosophical Transactions of the Royal Society B: Biological Sciences*, *365*(1550), 2289–2301. doi:10.1098/rstb.2010.0082
- Mueller, T., & Fagan, W. F. (2008). Search and navigation in dynamic environments – from individual behaviors to population distributions. *Oikos*, *117*(5), 654–664. doi:10.1111/j.0030-1299.2008.16291.x
- Nams, V. O. (2014). Combining animal movements and behavioural data to detect behavioural states. *Ecology Letters*, *17*(10), 1228–1237. doi:10.1111/ele.12328
- Nathan, R., Getz, W. M., Revilla, E., Holyoak, M., Kadmon, R., Saltz, D., & Smouse, P. E. (2008). A movement ecology paradigm for unifying organismal movement research. *Proceedings of the National Academy of Sciences*, *105*(49), 19052–19059. doi:10.1073/pnas.0800375105
- Nicholson, K. L., Warren, M. J., Rostan, C., Månsson, J., Paragi, T. F., & Sand, H. (2019). Using fine-scale movement patterns to infer ungulate parturition. *Ecological Indicators*, *101*, 22–30. doi:10.1016/j.ecolind.2019.01.004
- Norton, D. W. (1972). Incubation Schedules of Four Species of Calidridine Sandpipers at Barrow, Alaska. *The Condor*, *74*(2), 164–176. doi:10.2307/1366280

- Ojowski, U., Eidtmann, C., Furness, R., & Garthe, S. (2001). Diet and nest attendance of incubating and chick-rearing northern fulmars (*Fulmarus glacialis*) in Shetland. *Marine Biology*, 139(6), 1193–1200. doi:10.1007/s002270100655
- Orians, G. H., & Pearson, N. E. (1979). On the theory of central place foraging. In *Analysis of Ecological Systems* (pp. 154–177). Ohio University Press.
- Pettorelli, N., Laurance, W. F., O'Brien, T. G., Wegmann, M., Nagendra, H., & Turner, W. (2014). Satellite remote sensing for applied ecologists: opportunities and challenges. *Journal of Applied Ecology*, 51(4), 839–848. doi:10.1111/1365-2664.12261
- Plummer, M. (2003). JAGS: A program for analysis of Bayesian graphical models using Gibbs sampling. *Working Papers*, 8.
- Polansky Leo, Kilian Werner, & Wittemyer George. (2015). Elucidating the significance of spatial memory on movement decisions by African savannah elephants using state–space models. *Proceedings of the Royal Society B: Biological Sciences*, 282(1805), 20143042. doi:10.1098/rspb.2014.3042
- Powell, L. L., Hodgman, T. P., Glanz, W. E., Osenton, J. D., & Fisher, C. M. (2010). Nest-Site Selection and Nest Survival of the Rusty Blackbird: Does Timber Management Adjacent to Wetlands Create Ecological Traps? *The Condor*, 112(4), 800–809. doi:10.1525/cond.2010.100152
- Riotte-Lambert, L., Benhamou, S., & Chamaillé-Jammes, S. (2013). Periodicity analysis of movement recursions. *Journal of Theoretical Biology*, 317, 238–243. doi:10.1016/j.jtbi.2012.10.026
- Schaub, M., & Royle, J. A. (2014). Estimating true instead of apparent survival using spatial Cormack–Jolly–Seber models. *Methods in Ecology and Evolution*, 5(12), 1316–1326. doi:10.1111/2041-210X.12134
- Schick, R. S., Loarie, S. R., Colchero, F., Best, B. D., Boustany, A., Conde, D. A., ... Clark, J. S. (2008). Understanding movement data and movement processes: current and emerging directions. *Ecology Letters*, 11(12), 1338–1350. doi:10.1111/j.1461-0248.2008.01249.x

- Severud, W. J., Giudice, G. D., Obermoller, T. R., Enright, T. A., Wright, R. G., & Forester, J. D. (2015). Using GPS collars to determine parturition and cause-specific mortality of moose calves. *Wildlife Society Bulletin*, 39(3), 616–625. doi:10.1002/wsb.558
- Singh Navinder J., & Ericsson Göran. (2014). Changing motivations during migration: linking movement speed to reproductive status in a migratory large mammal. *Biology Letters*, 10(6), 20140379. doi:10.1098/rsbl.2014.0379
- Snow, D. W., Perrins, C. M., Hillcoat, B., Gillmor, R., & Roselaar, C. S. (1997). The birds of the Western Palearctic. concise edition. Retrieved from <https://dare.uva.nl/search?identifier=2997a701-3eac-4e5a-835f-981bfced489e>
- Soleymani, A., Pennekamp, F., Dodge, S., & Weibel, R. (2017). Characterizing change points and continuous transitions in movement behaviours using wavelet decomposition. *Methods in Ecology and Evolution*, 8(9), 1113–1123. doi:10.1111/2041-210X.12755
- Thiebault, A., Dubroca, L., Mullers, R. H. E., Tremblay, Y., & Pistorius, P. A. (2018). “m2b” package in r: Deriving multiple variables from movement data to predict behavioural states with random forests. *Methods in Ecology and Evolution*, 9(6), 1548–1555. doi:10.1111/2041-210X.12989
- Tomkiewicz Stanley M., Fuller Mark R., Kie John G., & Bates Kirk K. (2010). Global positioning system and associated technologies in animal behaviour and ecological research. *Philosophical Transactions of the Royal Society B: Biological Sciences*, 365(1550), 2163–2176. doi:10.1098/rstb.2010.0090
- Urbano Ferdinando, Cagnacci Francesca, Calenge Clément, Dettki Holger, Cameron Alison, & Neteler Markus. (2010). Wildlife tracking data management: a new vision. *Philosophical Transactions of the Royal Society B: Biological Sciences*, 365(1550), 2177–2185. doi:10.1098/rstb.2010.0081
- Van Moorter, B., Visscher, D. R., Jerde, C. L., Frair, J. L., & Merrill, E. H. (2010). Identifying Movement States From Location Data Using Cluster Analysis. *Journal of Wildlife Management*, 74(3), 588–594. doi:10.2193/2009-155
- van Vessem, J., & Draulans, D. (1986). Nest Attendance by Male and Female Gray Herons. *Journal of Field Ornithology*, 57(1), 34–41.

Webb, N. F., Hebblewhite, M., & Merrill, E. H. (n.d.). Statistical Methods for Identifying Wolf Kill Sites Using Global Positioning System Locations. *The Journal of Wildlife Management*, 72(3), 798–807. doi:10.2193/2006-566

Wilmers, C. C., Nickel, B., Bryce, C. M., Smith, J. A., Wheat, R. E., & Yovovich, V. (2015). The golden age of bio-logging: how animal-borne sensors are advancing the frontiers of ecology. *Ecology*, 96(7), 1741–1753. doi:10.1890/14-1401.1

461

462 **Figures and Tables**

463

464 Table 1 – Differences among GPS-tracking datasets for wood storks, lesser kestrels, and Mediterranean  
465 gulls in terms of sample sizes, data characteristics, and species seasonality and ecology.

|                                        |                     | Wood stork                           | Lesser kestrel         | Mediterranean gull |
|----------------------------------------|---------------------|--------------------------------------|------------------------|--------------------|
| Spatial resolution (m)                 |                     | 18                                   | <10                    | <10                |
| Temporal resolution (min)              |                     | 60                                   | 15 summer/30<br>winter | 15                 |
| Fix failure rate                       |                     | High                                 | Low                    | Low                |
| Tagged at                              |                     | Fledging/non-breeding                | Early nestling-rearing | Incubation         |
| Number of tracks<br>(individual-years) | Total               | 148                                  | 53                     | 29                 |
|                                        | Known nest location | 107                                  | 53                     | 29                 |
|                                        | Known outcome       | 0                                    | 53                     | 29                 |
|                                        | Non-breeders        | 41 (subadults)                       | 16 (winter)            | 16 (winter)        |
| Breeding season                        |                     | Nov-Aug<br>(varies with<br>latitude) | Apr-Jul                | Apr-Jul            |
| Breeding cycle (days)                  |                     | 110                                  | 60                     | 60                 |

466

467 Table 2 – Results of Classification and Regression Trees (CART) on nest versus non-nest sites,  
468 including parameter values used to identify nest sites among re-visited locations and cross-validated



469 error rates. Values marked with an asterisk were not taken from the CART output, but were chosen as  
470 reasonable thresholds for selecting nest sites. Consecutive days: maximum number of consecutive days  
471 spent at a location. Days visited: percentage of days when a location was visited between the first and  
472 last visits. Attendance on top day: percentage of GPS fixes at a location on the day with maximum  
473 attendance.

|                                                        | Wood stork | Lesser kestrel | Mediterranean gull |
|--------------------------------------------------------|------------|----------------|--------------------|
| Consecutive days (minimum)                             | 18         | 4*             | 8*                 |
| Days visited (minimum)                                 | 1%         | 1%             | 1%                 |
| Attendance on top day (minimum)                        | 90%        | 52%            | 45%                |
| Cross-validated type I error rate<br>(false positive)  | 6%         | 5%             | 30%                |
| Cross-validated type II error rate<br>(false negative) | 8%         | 10%            | 20%                |

474

475 Table 3 – Performance metrics of the nest identification algorithm (see Methods for definitions).

|                           | Wood stork | Lesser kestrel | Mediterranean gull |
|---------------------------|------------|----------------|--------------------|
| Positive predictive value | 86.79%     | 93.48%         | 78.57%             |
| Sensitivity               | 85.98%     | 81.13%         | 75.86%             |
| False negative rate       | 14.02%     | 18.87%         | 24.14%             |
| False positive rate       | 0%         | 68.75%         | 6.25%              |

476

477

478 Figure 1 – Workflow of the analysis to identify nest sites and estimate reproductive outcome from  
479 telemetry data. The R package nestR includes functions to tackle each of the steps depicted in the  
480 boxes.

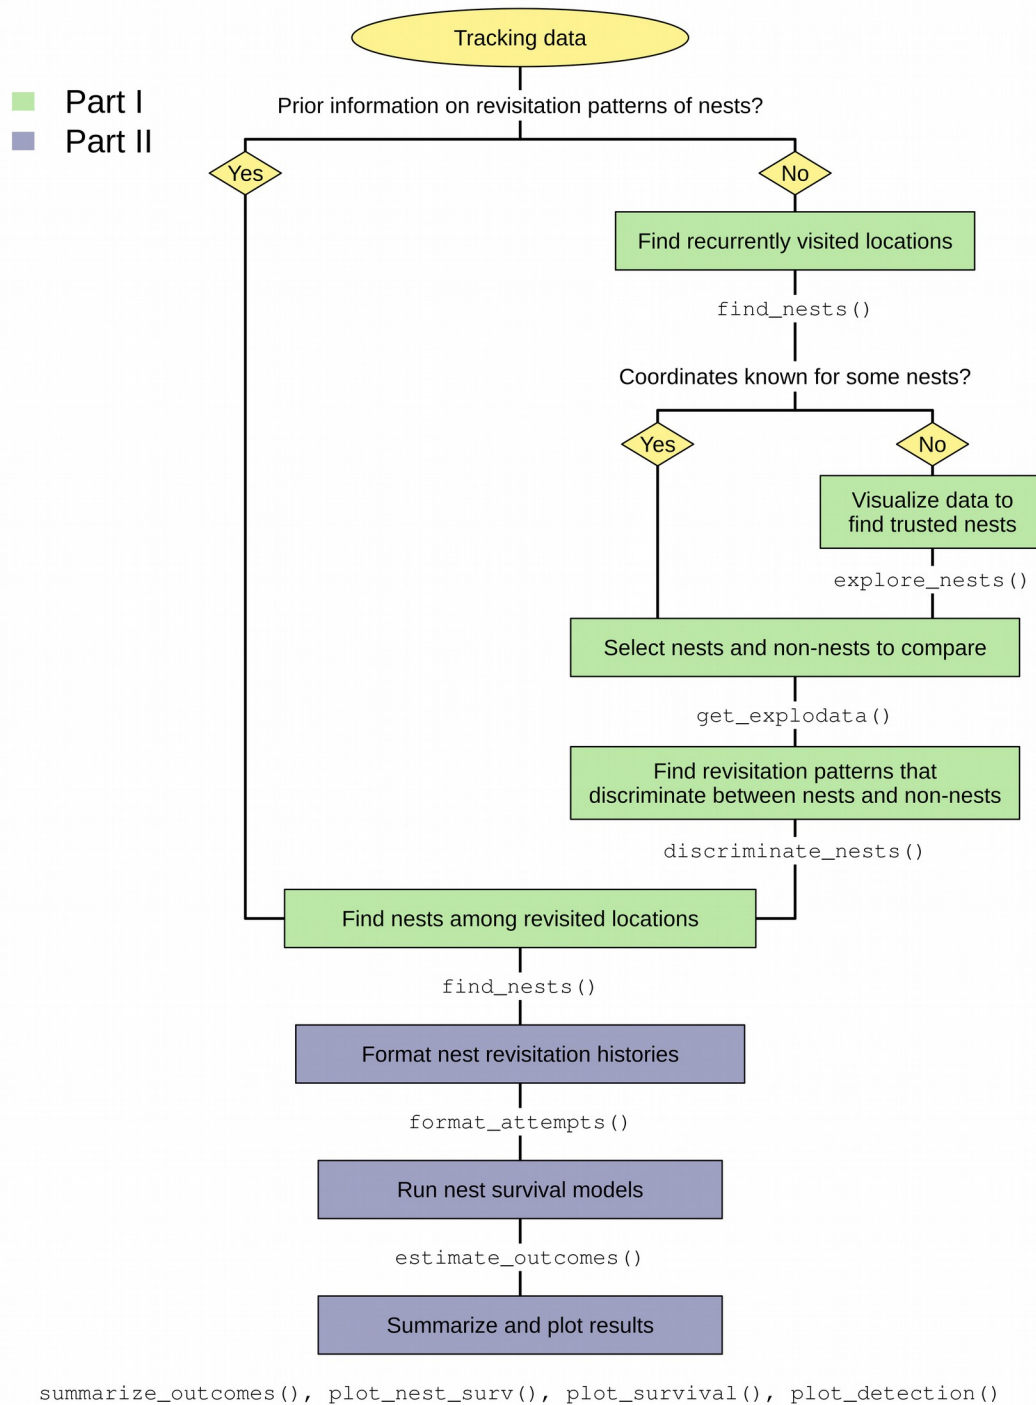

482 Figure 2 – Output of CART analysis to discriminate nest and non-nest sites in A) wood stork, B) lesser  
 483 kestrel, C) Mediterranean gull.

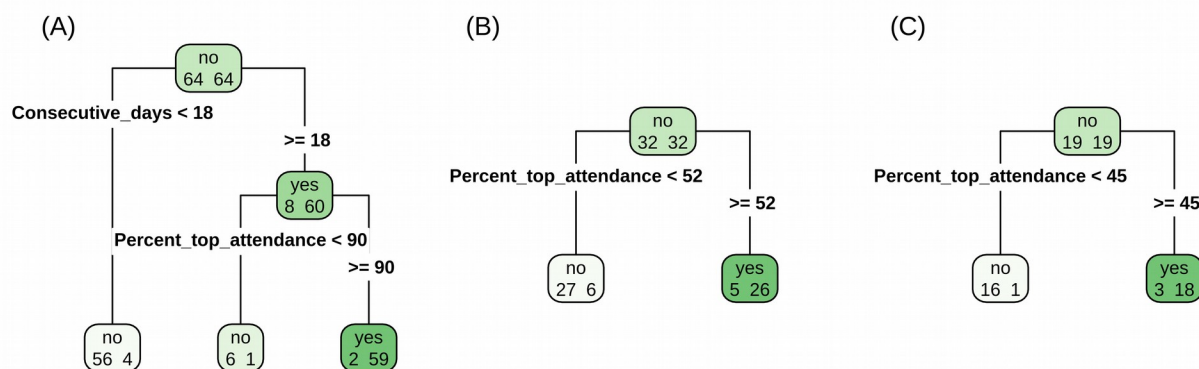

485 Figure 3 – Probability of visit detection (top row) and survival (bottom row) through time estimated at  
 486 the population level for A) wood stork, B) lesser kestrel, C) Mediterranean gull.

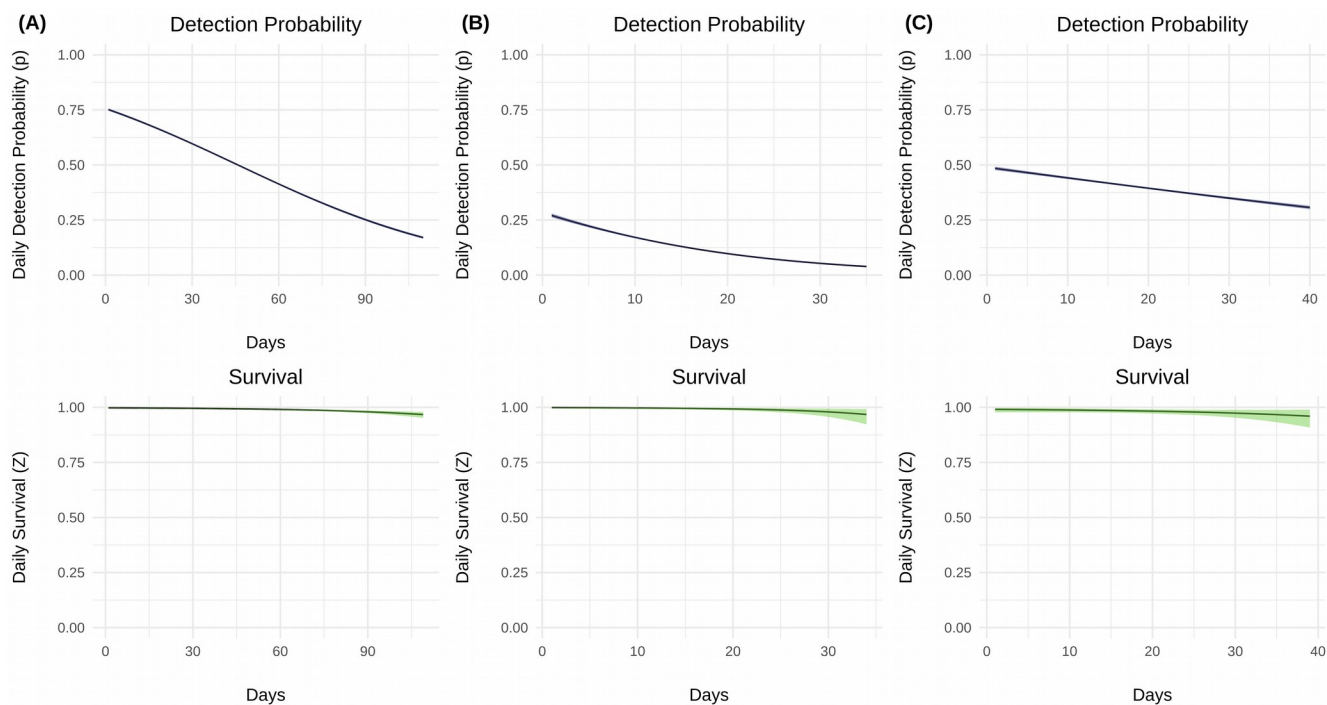

488 Figure 4 – Distribution of estimated survival probabilities for breeding attempts in relation to their true  
 489 outcome for A) lesser kestrels and B) Mediterranean gull.

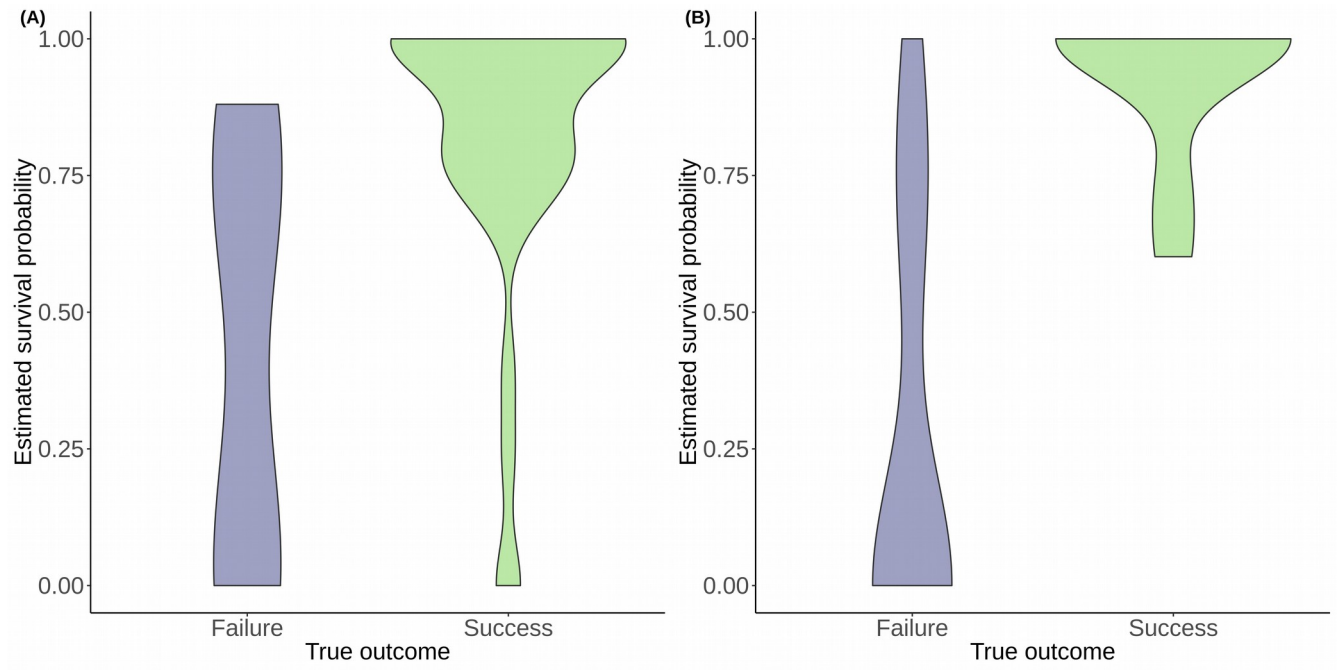

Source: https://www.biorxiv.org/content/early/2019/02/27/562025.full.pdf
